# Supplementary material for: Comparative modulation of lncRNAs in wild-type and rag1-heterozygous mutant zebrafish exposed to immune challenge with spring viraemia of carp virus (SVCV)
Source: PubMed Central journal article supplement (PMC6775065; doi:10.1038/s41598-019-50766-0), 2019-10-02

# **Comparative modulation of lncRNAs in wild-type and *rag1*-heterozygous mutant zebrafish exposed to immune challenge with spring viraemia of carp virus (SVCV)**

Valentina Valenzuela-Muñoz<sup>1\*</sup>, Patricia Pereiro<sup>1,2\*</sup>, Margarita Álvarez-Rodríguez<sup>2</sup>, Cristian Gallardo-Escárate<sup>1</sup>, Antonio Figueras<sup>2</sup>, Beatriz Novoa<sup>2</sup>

<sup>1</sup>Laboratory of Biotechnology and Aquatic Genomics, Interdisciplinary Center for Aquaculture Research (INCAR), University of Concepción, Concepción, Chile.

<sup>2</sup>Instituto de Investigaciones Marinas (IIM), CSIC, Vigo, Spain.

\*: these authors have contributed equally to this work

## ***Corresponding Authors***

***Beatriz Novoa***, Instituto de Investigaciones Marinas (IIM), CSIC, Eduardo Cabello 6, 36208, Vigo, Spain  
([beatriznova@iim.csic.es](mailto:beatriznova@iim.csic.es))

***C Gallardo-Escárate***, Universidad de Concepción, P.O. Box 160-C, Concepción 4030000, Chile (e-mail: [crisgallardo@udec.cl](mailto:crisgallardo@udec.cl))

## Supplementary figures

**Figure S1.** Survival curve of WT and *rag1*<sup>+/-</sup> zebrafish infected with SVCV.

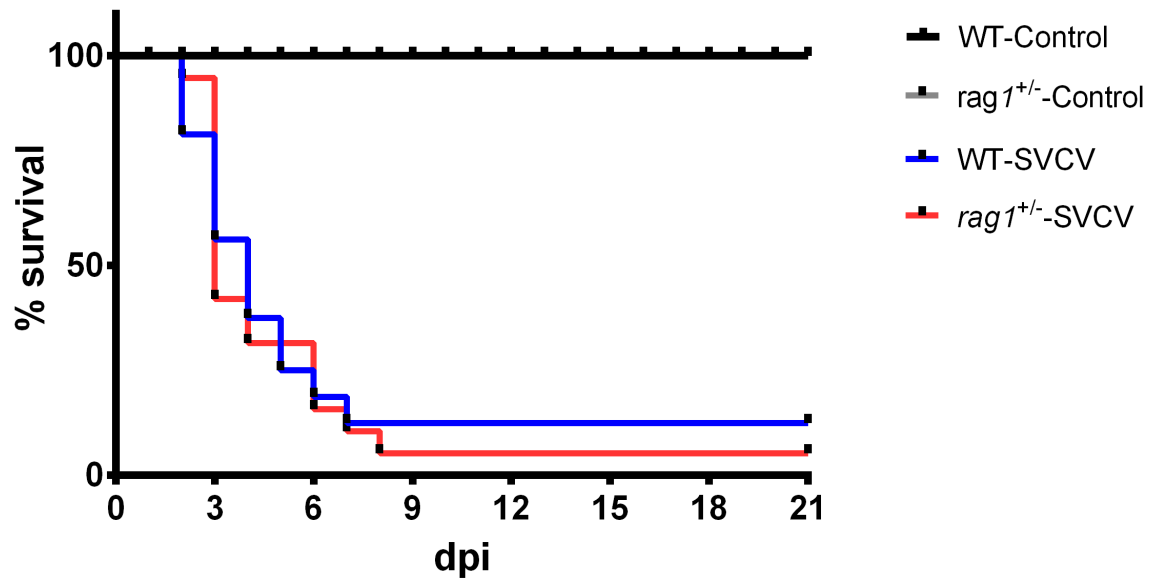

**Figure S2.** GO enrichment analysis of exclusive coding RNAs differently expressed in WT and *rag1*<sup>+/-</sup> zebrafish during SVCV infection.

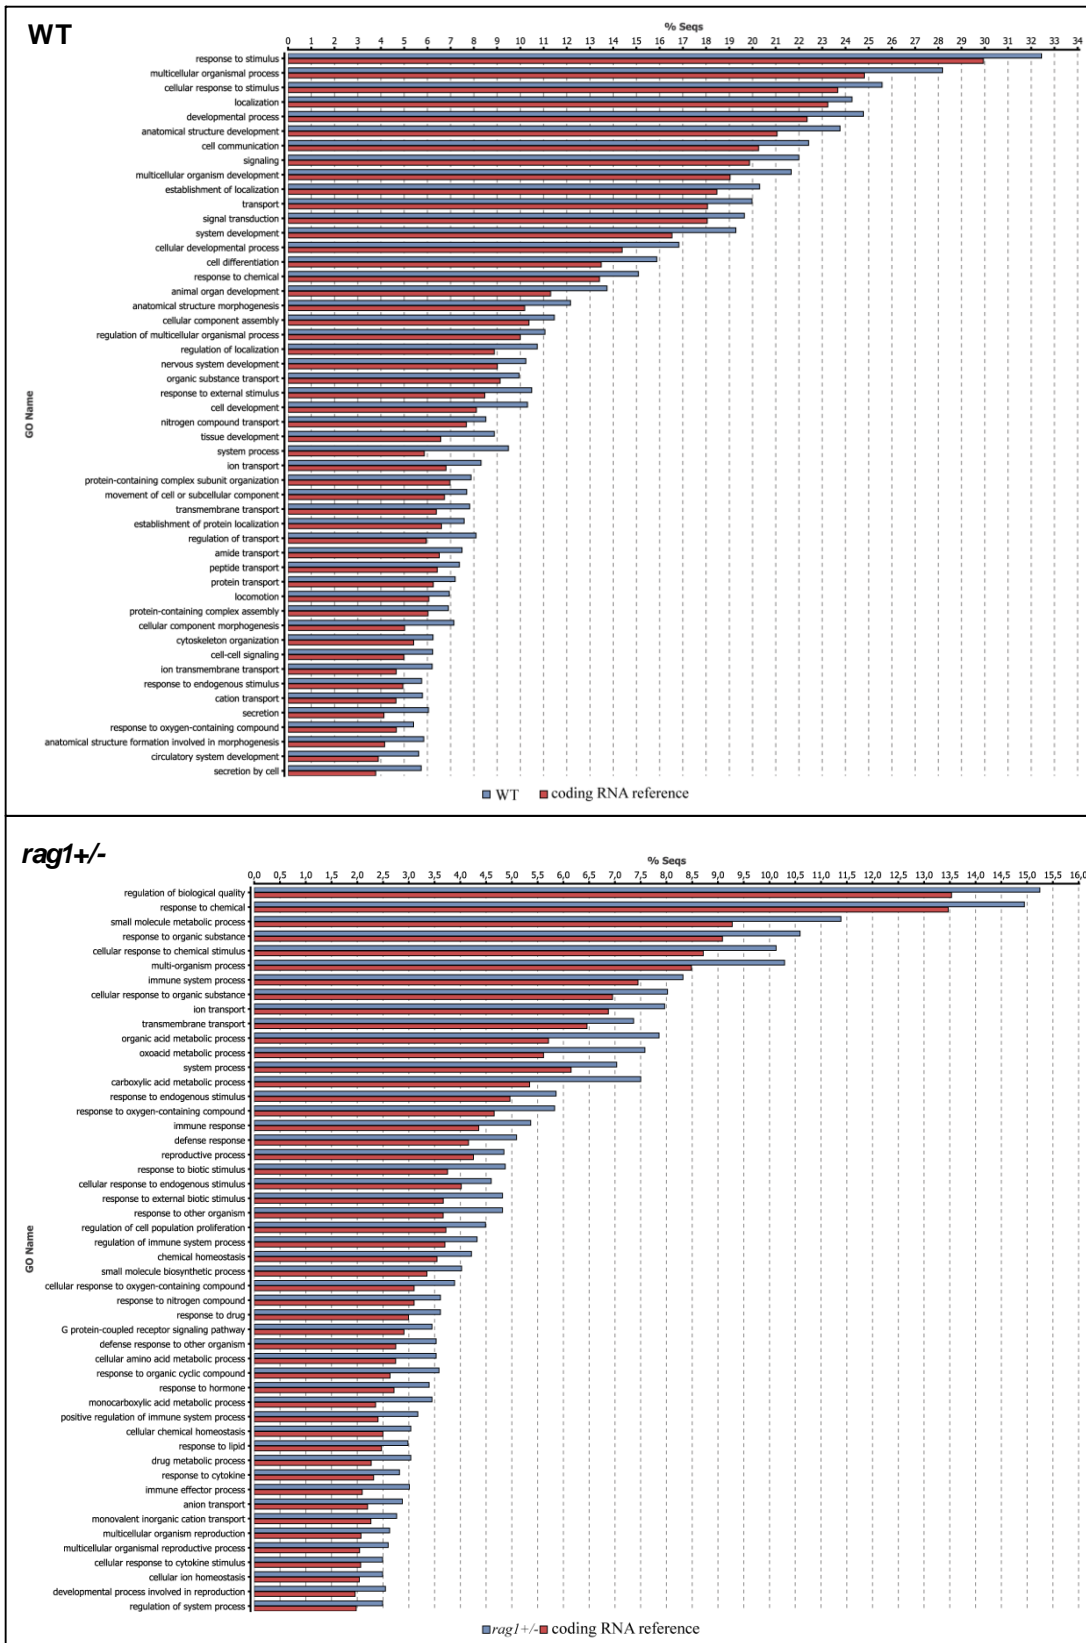

Supplement: 41598_2019_50766_MOESM1_ESM.pdf [file 41598_2019_50766_MOESM1_ESM.pdf]
